# Supplementary material for: Dual-key cooperatively activated DNA regulator for controlling mitochondria-lysosome interactions
Source: Research Square preprint supplement (doi:10.21203/rs.3.rs-6112154/v1), 2025-03-13
Supplement: Supplementary file 1 [file 363cb5bc07912d21046f2c41.docx]

**Supplementary Information**

**Dual-key cooperatively activated DNA regulator for controlling mitochondria-lysosome interactions and precision cancer therapy**

Yang Xiao,a Longyi Zhu,a Songyuan Du,a,b Xinyi Ge,a,b Lequn Ma,a Shengyuan Dengb*and Kewei Rena*

aSchool of Chemistry and Chemical Engineering, Nanjing University of Science and Technology, Nanjing, 210094, China.

e-mail: kwren@njust.edu.cn

bSchool of Environmental and Biological Engineering, Nanjing University of Science and Technology, Nanjing 210094, P.R. China.

e-mail: sydeng@njust.edu.cn

# Supplementary Table

**Supplementary Table 1.** Sequences of DNA used in this project

| **CD63** | CACCCCACCTCGCTCCCGTGACACTAATGCTAGTTCTA |
| --- | --- |
| **CD63-FAM** | CACCCCACCTCGCTCCCGTGACACTAATGC /**I6FAMd**/ TA |
| **B1** | TAGCATTAGTGTCA |
| **B2** | CGGGAGCGA /**PC-Linker**/ GGTGGGGTG |
| **CD63APT** | CACCCCACCTCGCTCCCGTGACACTAATGCTATTTTTTTTTTTTTTTTTTTTTTTTTTTTTTTTTTTTTTTTTTTTTTTTTTTTTTTTTTTT-Azide |
| **CD63APT-FAM** | CACCCCACCTCGCTCCCGTGACACTAATGC /**I6FAMd**/ TATTTTTTTTTTT TTTTTTTTTTTTTTTTTTTTTTTTTTTTTTTTTTTTTTTTTTTTTTTTT-Azide |
| **B3** | TAGCATTAGTG /**PC-Linker**/ TCACGGGAGCG /**SH-SH**/ AGGTGGGGTG |
| **R1-FAM** | TCGATCACTAGTTACAGAGTCTCTACGTGC /**I6FAMd**/ AA-Azide |
| **R1** | TCGATCACTAGTTACAGAGTCTCTACGTGCAA-Azide |

# Supplementary Figures


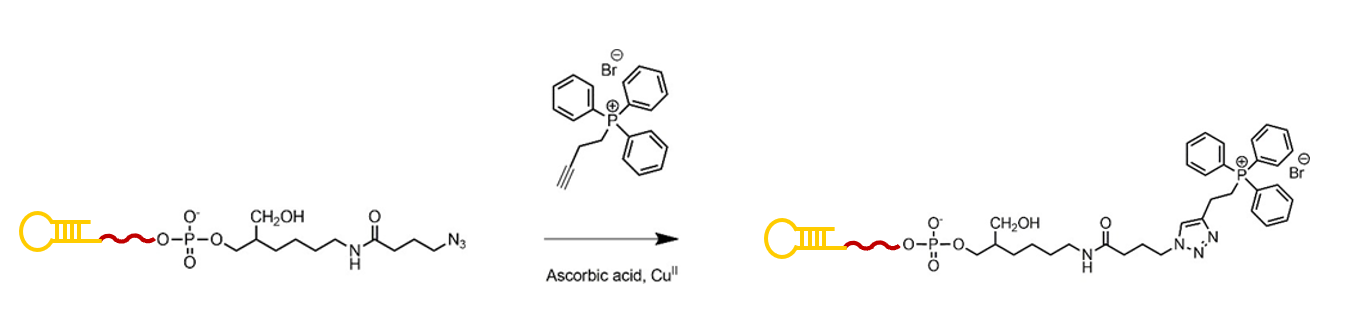


**Supplementary Figure 1.** Schematic synthesis of CD63APT-TPP.


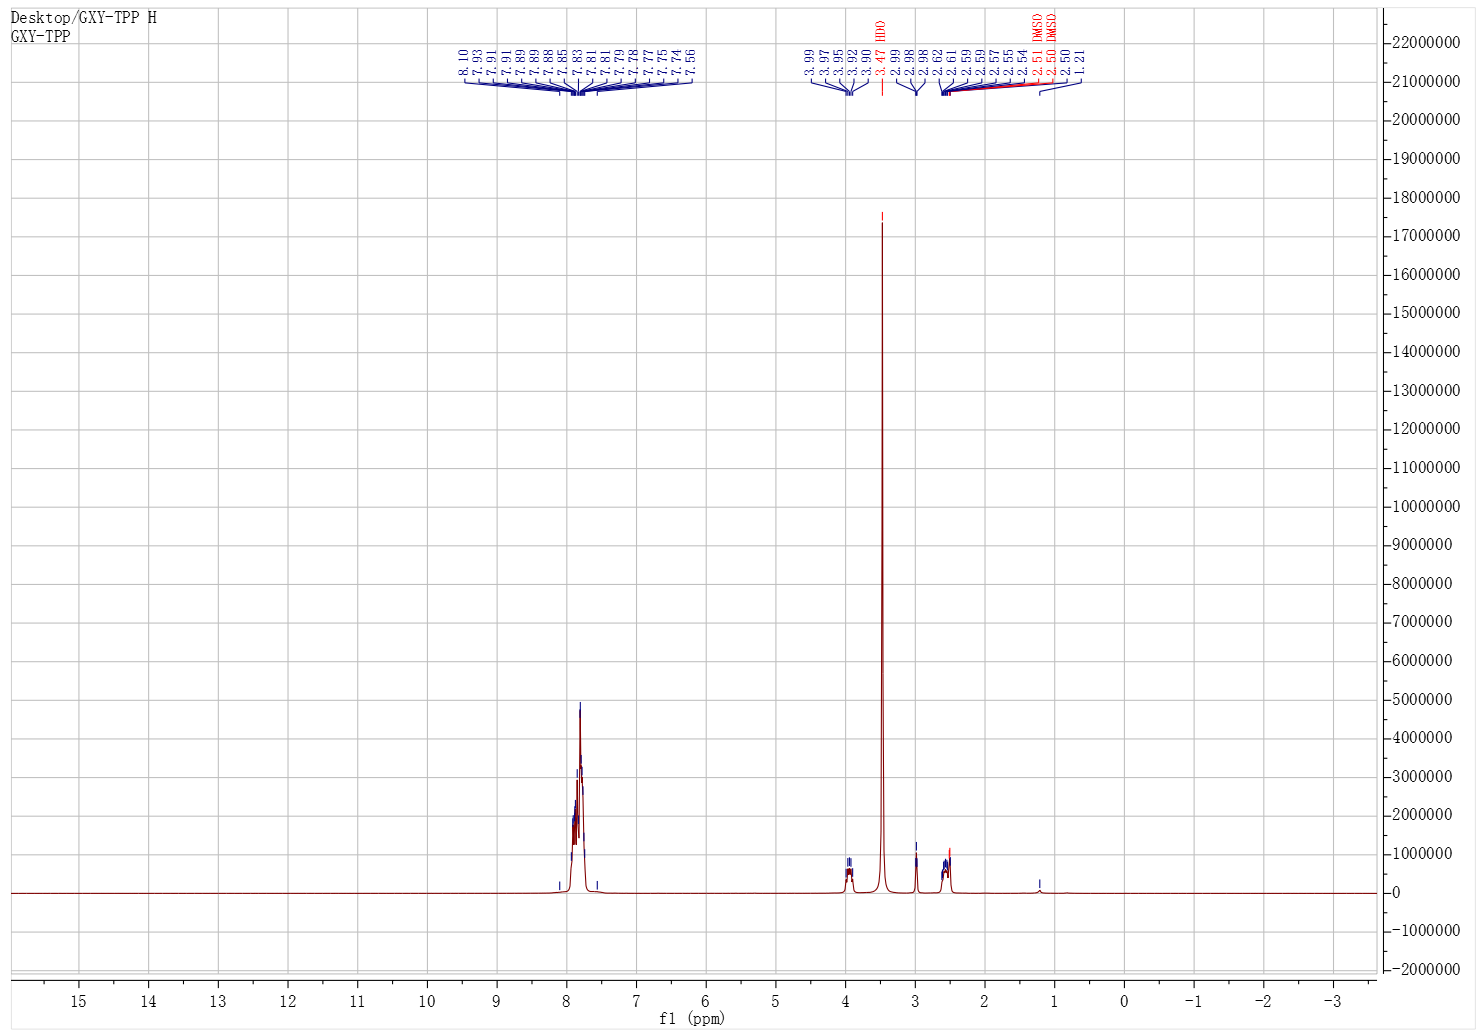


**Supplementary Figure 2.** 1H-NMR spectrum of alkynyl-TPP.


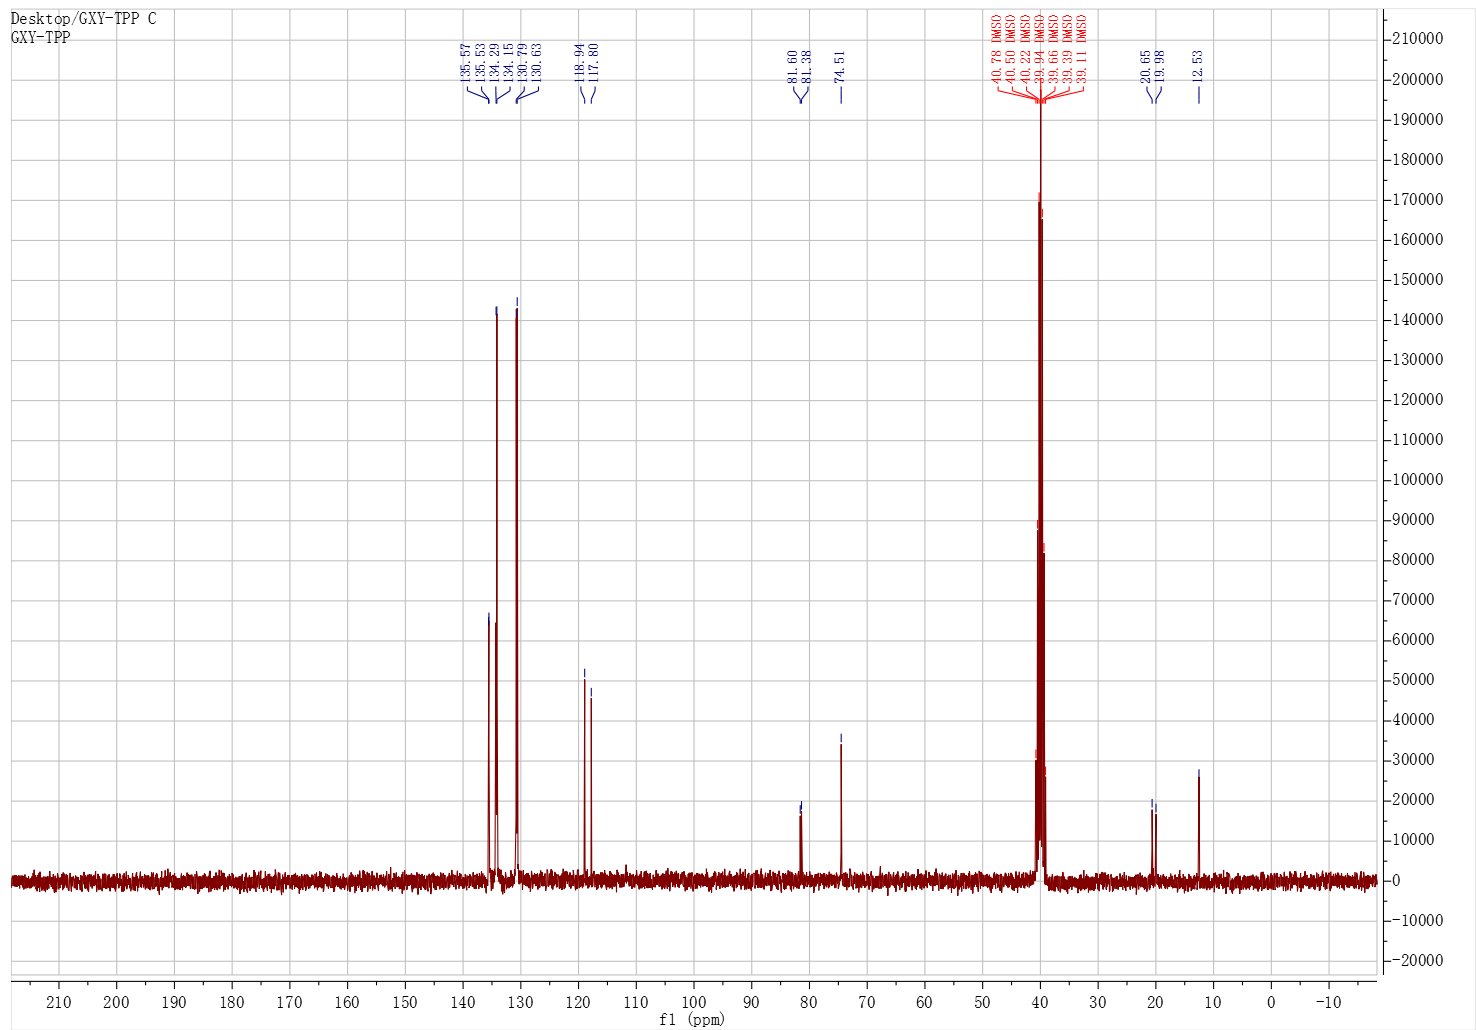


**Supplementary Figure 3.** 13C-NMR spectrum of alkynyl-TPP.


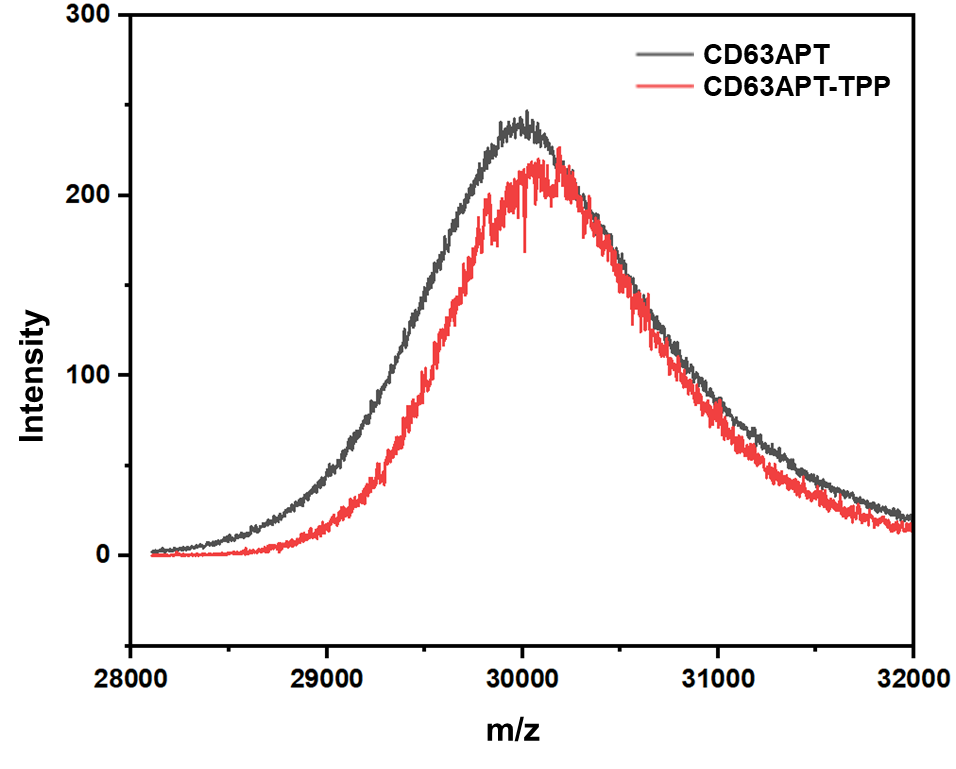


**Supplementary Figure 4.** MALDI-TOF MS spectra of CD63APT and CD63APT-TPP.


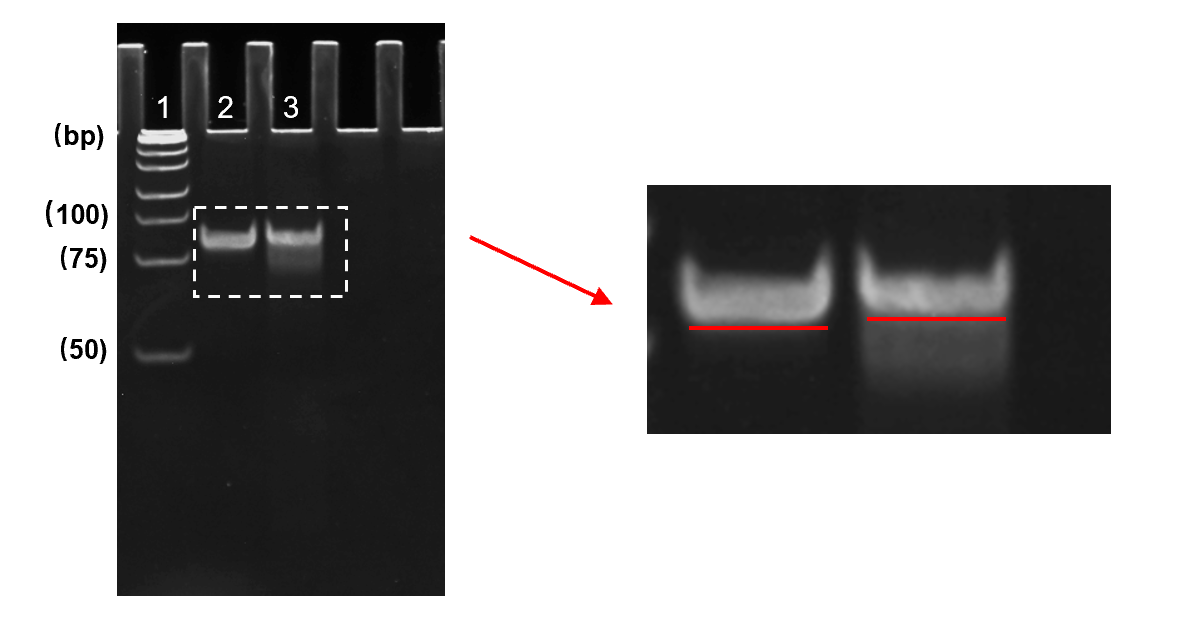


**Supplementary Figure 5. Native PAGE (20 wt.%) analysis of the synthetic CD63APT-TPP**. Lanes 1-3 represent from left to right: DNA ladder maker, CD63APT, and CD63APT-TPP.

**
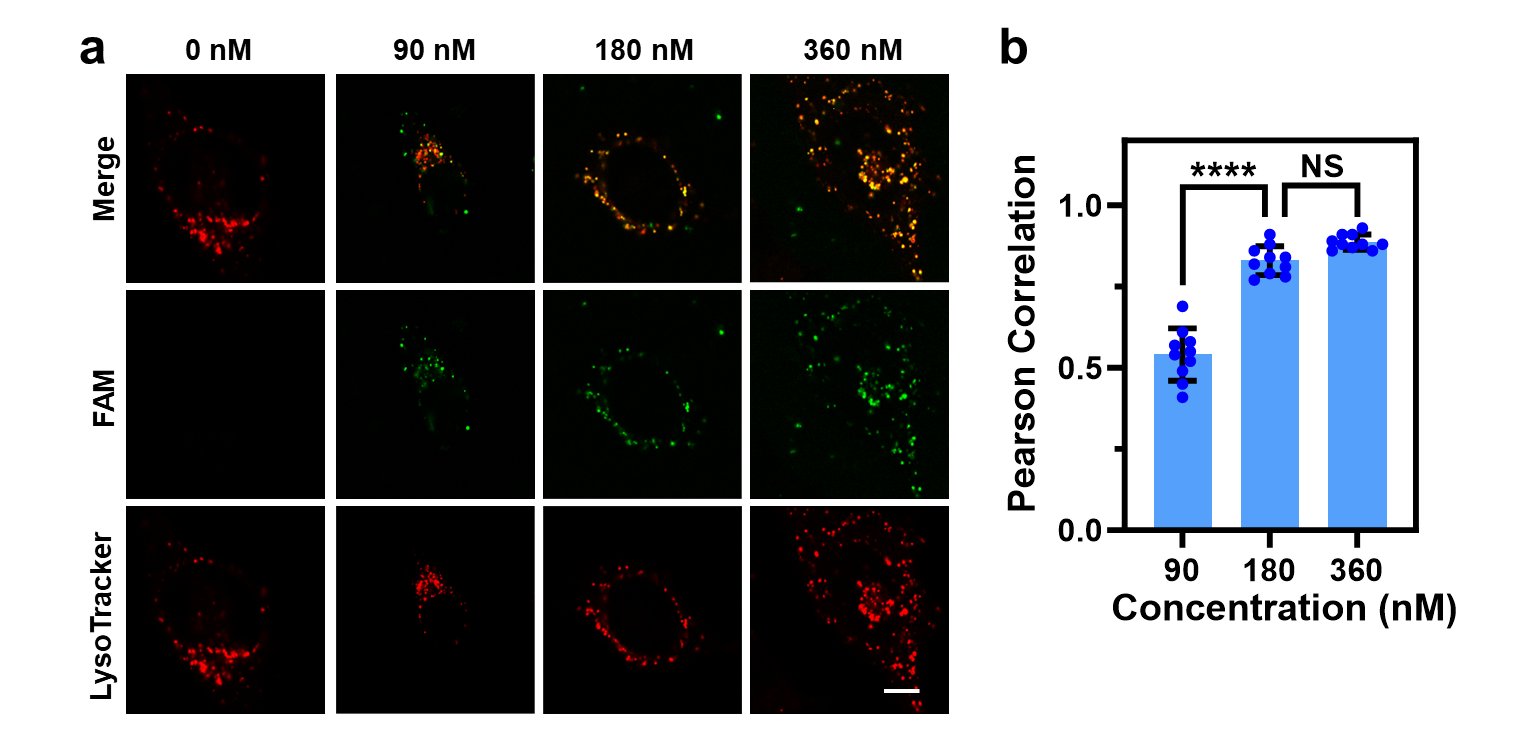
**

**Supplementary Figure 6. Optimization of OK-MLIR concentrations. a.** Confocal fluorescence images of HeLa cells incubated with different concentrations of OK-MLIR (0, 90, 180 and 360 nM). Scale bar: 10 µm. **b.** Pearson correlation analysis of Supplementary Figure 6a by investigating the fluorescence signals of FAM and LysoTracker. Shown are mean ± SEM from ten individual cells. ****P < 0.0001 (two-tailed Student’s *t*-test), NS: not significant.


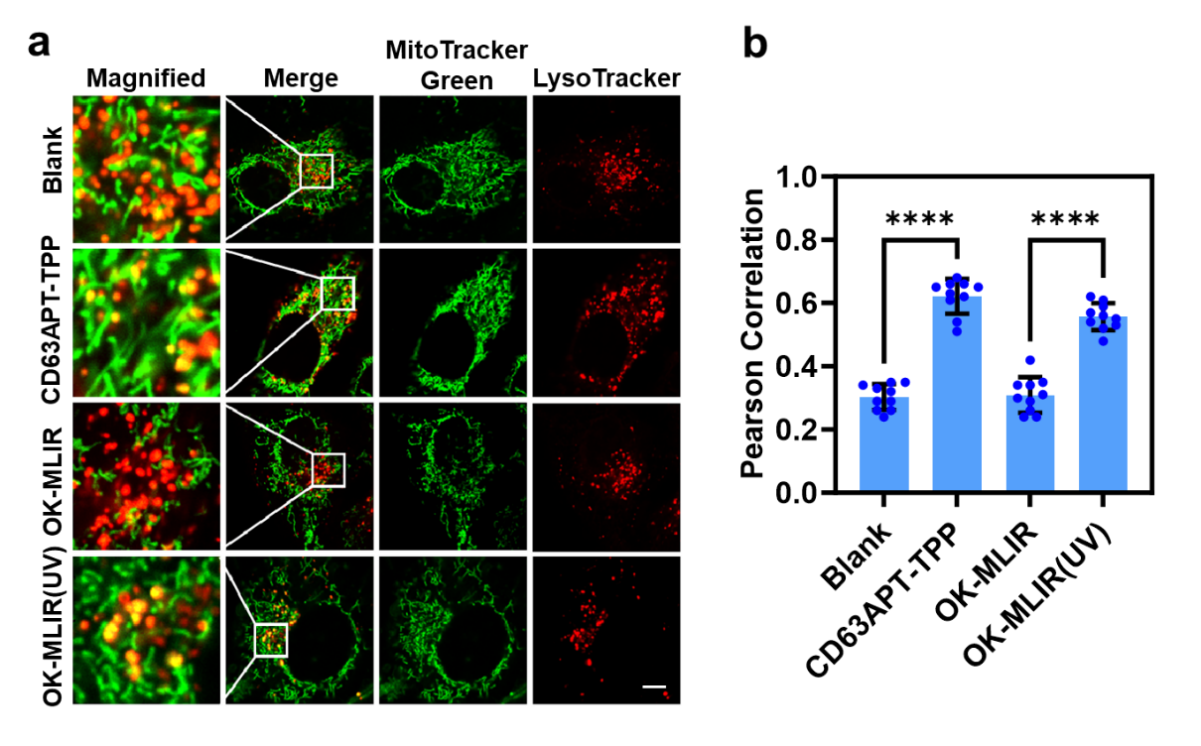


**Supplementary Figure 7. Characterization of mitochondria-lysosome Interactions regulated with OK-MLIR.** **a.** Confocal images of HeLa cells treated without (Blank), and with CD63APT-TPP and OK-MLIR (180 nM) in absence (the OK-MLIR row) and presence (OK-MLIR (UV)) of 10-min UV irradiation. Magnified, Magnify 5 times Scale bar: 10µm. **b**. Pearson correlation analysis of Supplementary Figure 7a by investigating the fluorescence signals of MitoTracker Green and LysoTracker. Shown are mean ± SEM from ten individual cells. ****P < 0.0001 (two-tailed Student’s *t*-test).


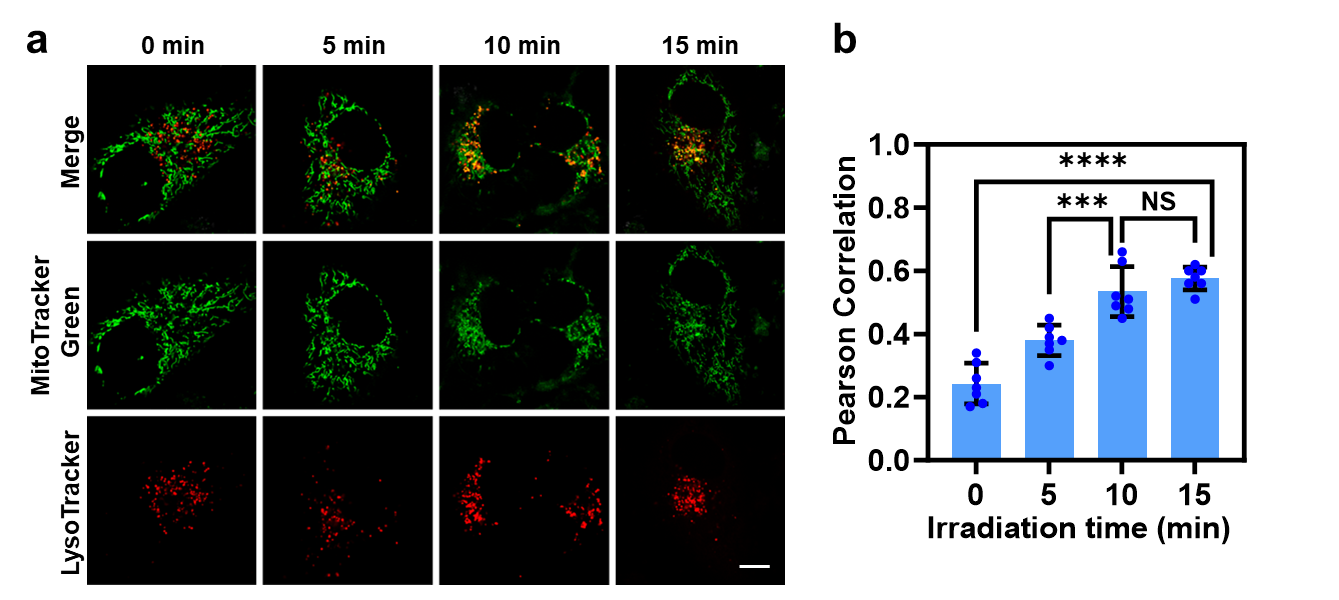


**Supplementary Figure 8. Optimization of UV irradiation times. a.** Confocal fluorescence images of 180 nM OK-MLIR-treated HeLa cells under different duration of UV irradiations. Scale bar: 10 µm. **b.** Pearson correlation analysis of Supplementary Figure 8a by investigating the fluorescence signals of MitoTracker Green and LysoTracker. Shown are mean ± SEM from ten individual cells. ****P < 0.0001, ***P < 0.001 (two-tailed Student’s *t*-test).


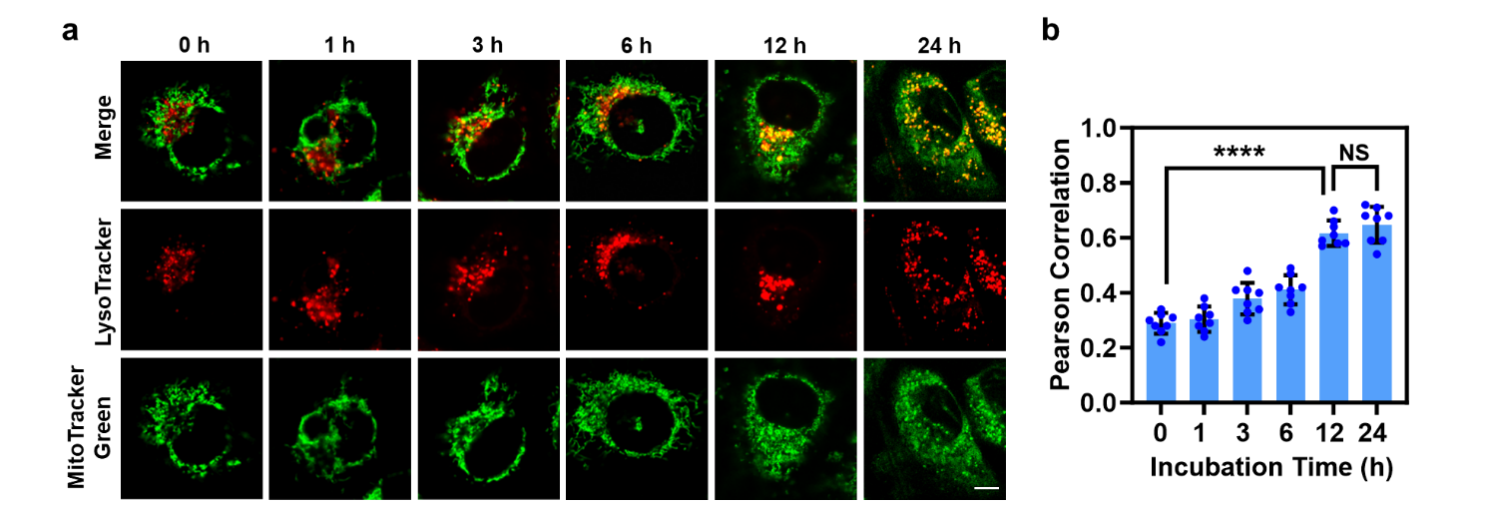


**Supplementary Figure 9. Optimization of Hea cells incubation time after the treatment with OK-MLIR and light irradiation. a.** Confocal fluorescence images of OK-MLIR and light irradiation treated Hela cells at different incubation time. Scale bar: 10 µm. **b.** Pearson correlation analysis of Supplementary Figure 9a by investigating the fluorescence signals of MitoTracker Green and LysoTracker. Shown are mean ± SEM from ten individual cells. ****P < 0.0001 (two-tailed Student’s *t*-test).

**Supplementary Figure 10. Contact between mitochondria and lysosomes in lysosomes.** Count the number of mitochondria and lysosomes in contacts for every 100 lysosomes from Fig. 2c. Shown are mean ± SEM from ten individual cells. ****P < 0.0001 (two-tailed Student’s *t*-test).

**
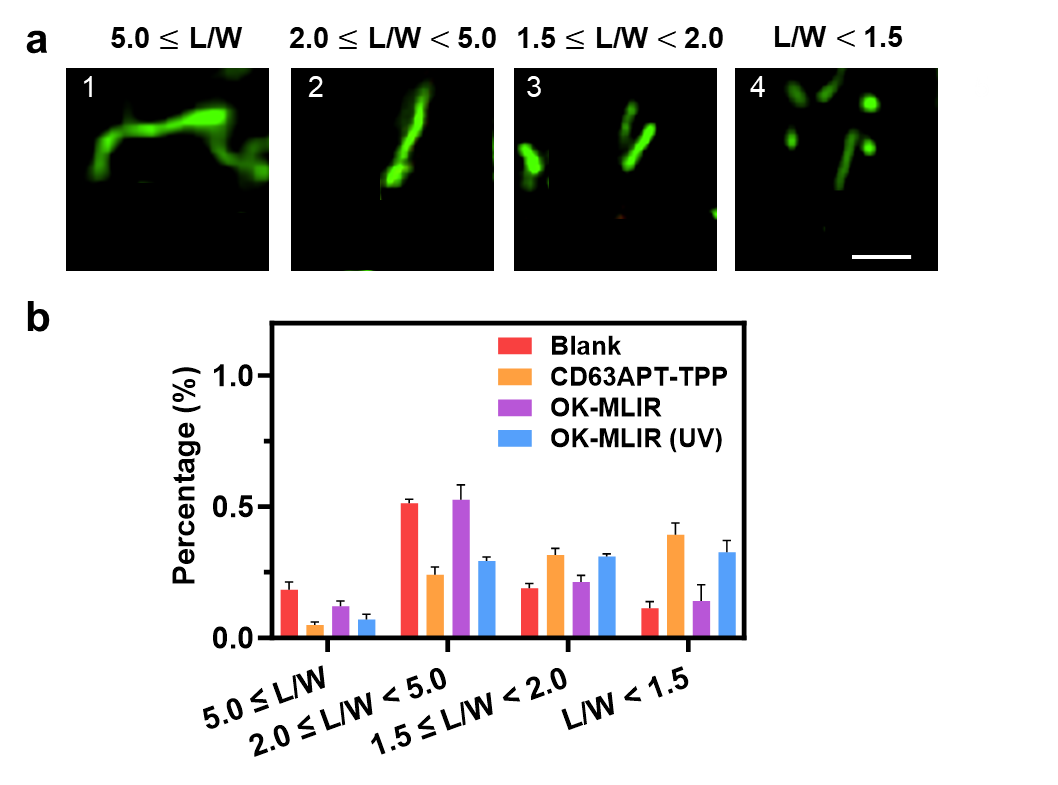
**

**Supplementary Figure 11. The OK-MLIR system for controlled regulation of mitochondrial fission. a.** Confocal images of mitochondria with different morphologies. “L” denotes length, “W” width, and “L/W” length divided by width. Scale bar: 2 µm. **b.** Quantitative analysis of mitochondrial morphology in HeLa cells treated without (Blank) and with CD63APT-TPP or OK-MLIR (180 nM) in absence (the OK-MLIR row) and presence (OK-MLIR (UV)) of 10-min UV irradiation. Shown are mean ± SEM from ten individual cells. ****P < 0.0001 (two-tailed Student’s *t*-test).

**
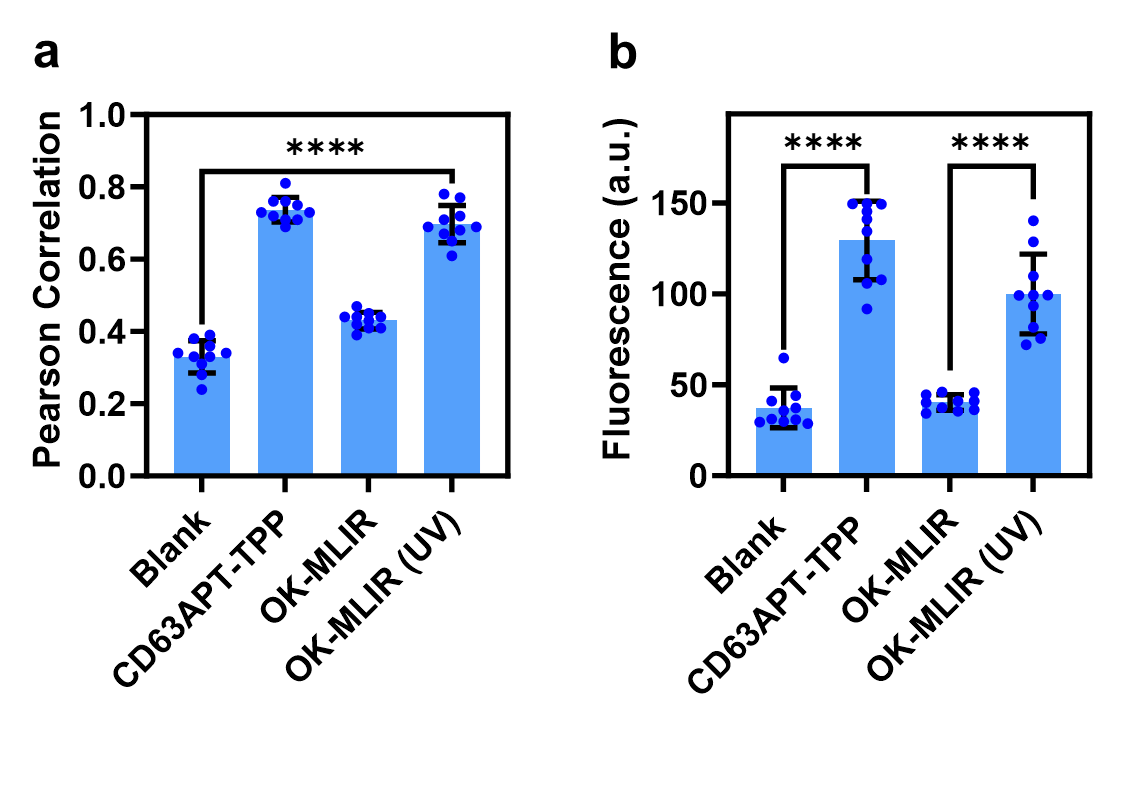
**

**Supplementary Figure 12. Colocalization analysis and fluorescence intensity statistics. a.** Quantitative colocalization analysis of purple and green parts in Fig. 2e. **b.** statistics of red fluorescence intensity were performed in Fig. 2e.Shown are mean ± SEM from ten individual cells. ****P < 0.0001 (two-tailed Student’s *t*-test).


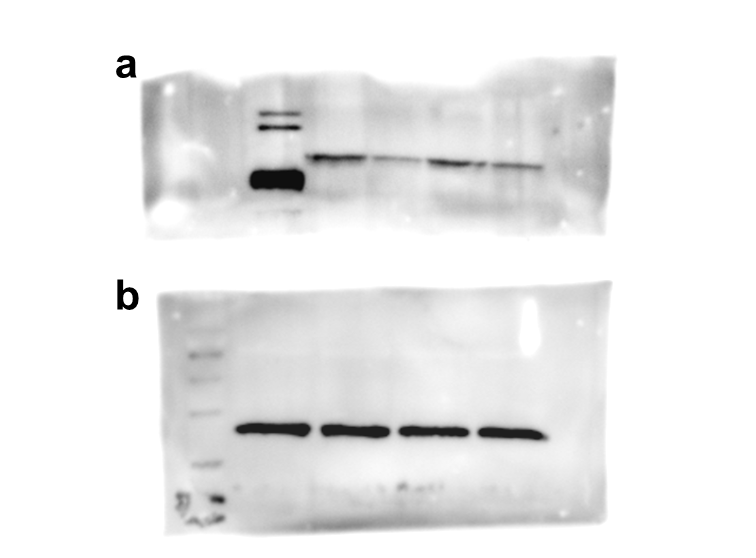


**Supplementary Figure 13.** The raw strips of Western blot experiment of Fig. 2h. **a.** TOMM20, **b.** GAPDH


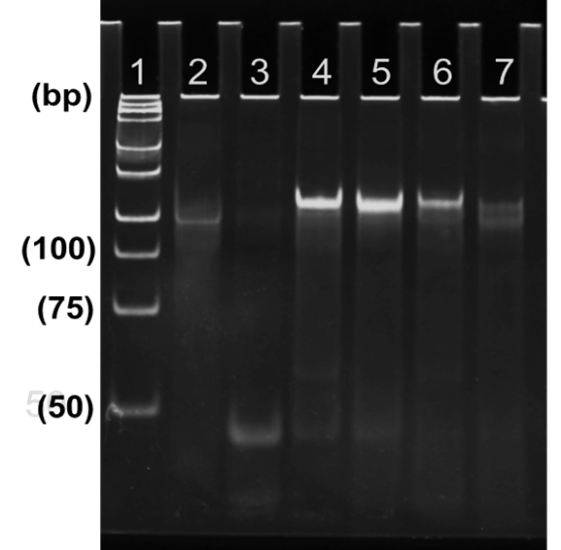


**Supplementary Figure 14. Native PAGE (10 wt.%) analysis of DK-MLIR assembly and activation by dual keys.** Lane 1-7 represent: DNA ladder, CD63APT-TPP, B3, CD63APT-TPP+ B3, CD63APT-TPP+ B3 with 10-min UV irradiation treatment, CD63APT-TPP+ B3 with 10 mM GSH treatment, and CD63APT-TPP + B3 with 10-min UV irradiation and 10 mM GSH treatments, respectively.


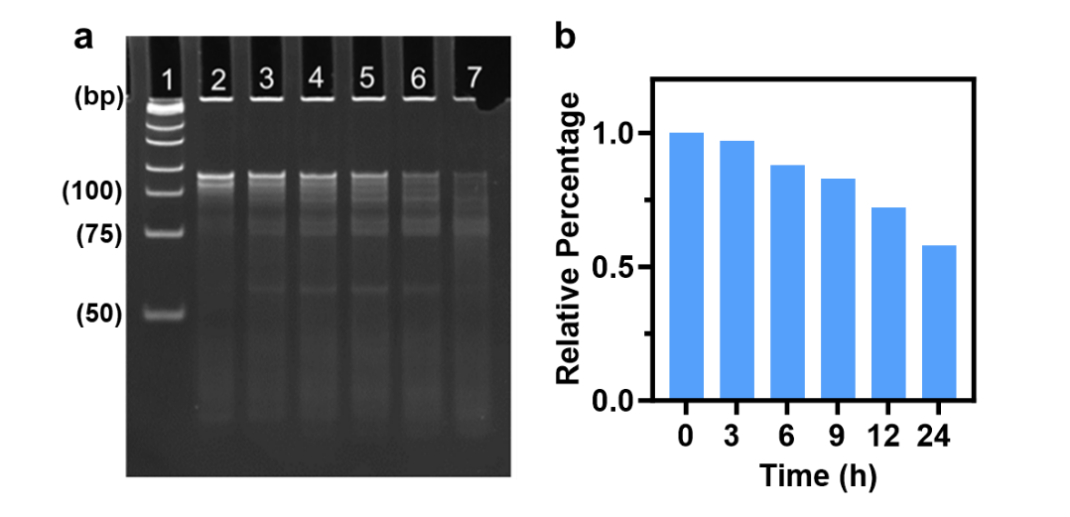


**Supplementary Figure 15. Stability study of DK-MLIR.** **a.** Native PAGE (10 wt.%) analysis of DK-MLIR in 10 % FBS over different incubation period. **b.** The stripe intensities extracted from corresponding Supplementary Figure 15a.

**
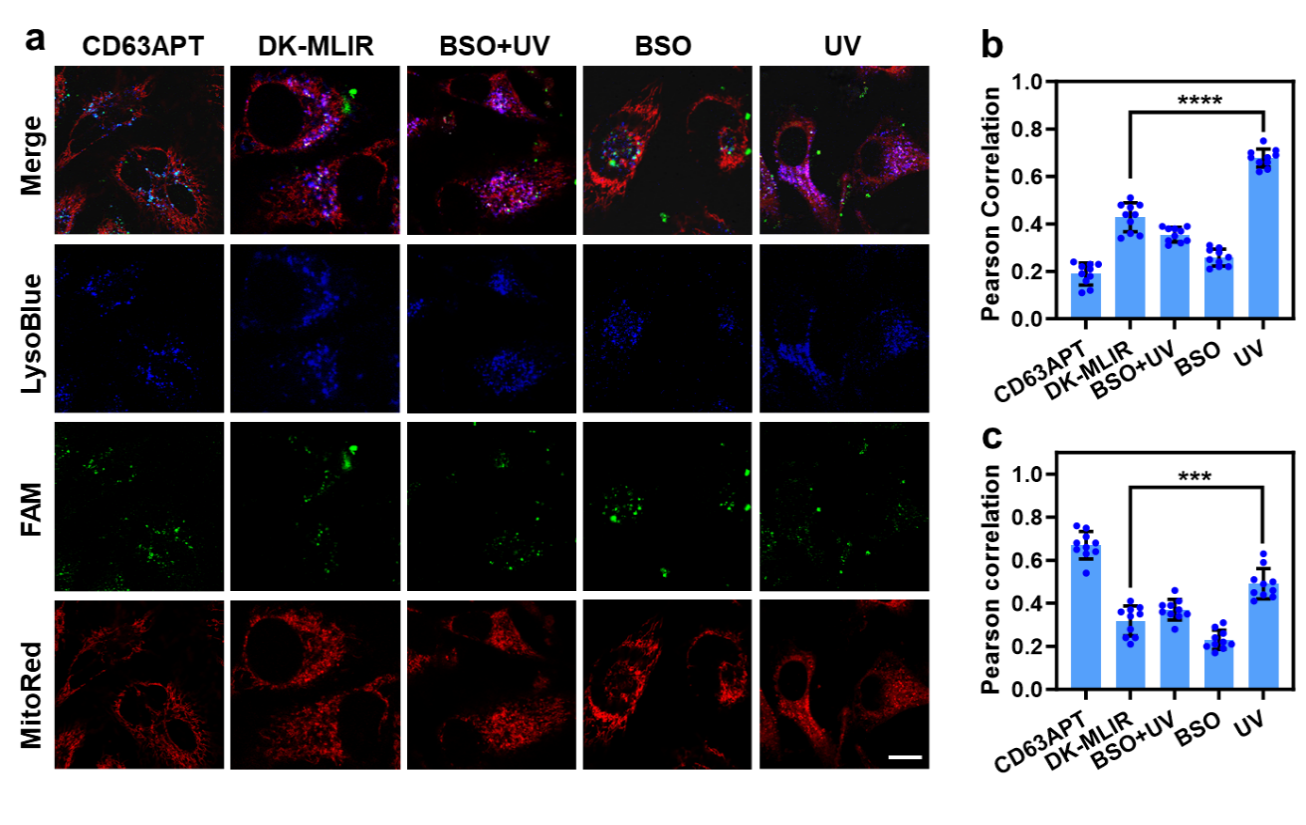
**

**Supplementary Figure 16. Performances of the****DK-MLIR system for modulating mitochondria-lysosome interactions in living cells.** **a.** Confocal images of HeLa cells transfected without (Blank) and with 180 nM CD63APT (CD63APT), 180 nM DK-MLIR in absence (OK-MLIR) and presence of 10-min UV irradiation (UV), 100 µM BSO inhibitor (BSO), as well as UV irradiation and BSO inhibitor (BSO+UV). Scale bar: 20 µm. **b.** Pearson correlation analysis of Supplementary Figure 16a by investigating the fluorescence signals of MitoRed and LysoBlue. Shown are mean ± SEM from ten individual cells. ****P < 0.0001 (two-tailed Student’s *t*-test). **c.** Pearson correlation analysis of Supplementary Figure 16a by investigating the fluorescence signals of FAM and LysoBlue. Shown are mean ± SEM from ten individual cells. ****P < 0.0001 (two-tailed Student’s *t*-test).


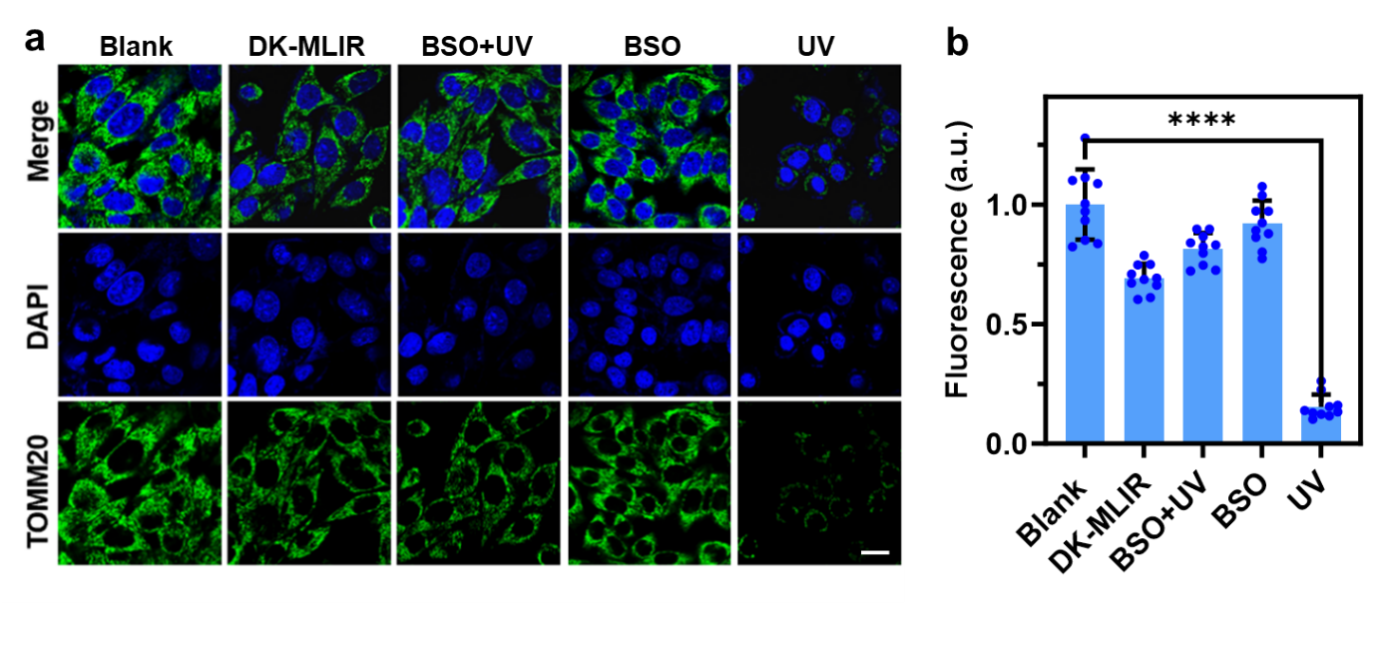


**Supplementary Figure 17. Expression level of TOMM20. a.** Confocal immunofluorescence staining images of HeLa cells transfected without (Blank) and with DK-MLIR (180 nM) in absence (OK-MLIR), and presence of 10-min UV irradiation (UV), BSO inhibitor (100 µM BSO), as well as UV irradiation and BSO inhibitor (BSO+UV). Scale bar: 50 µm. **b.** Fluorescence intensities extracted from corresponding Supplementary Figure 17a. Shown are mean ± SEM from ten individual cells. ****P < 0.0001 (two-tailed Student’s *t*-test).


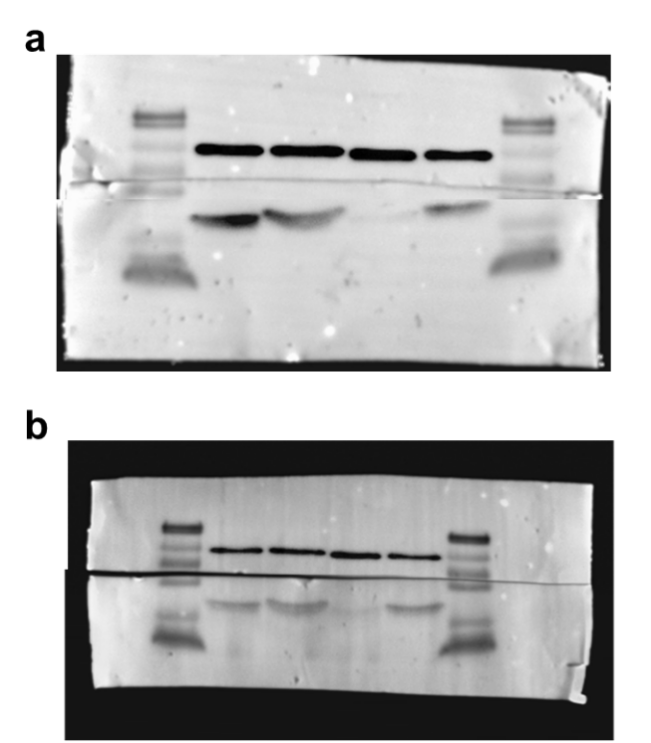


**Supplementary Figure 18.** Raw strips of Western blot experiment for Fig. 3f. **a.** TOMM20, GAPDH. **b.** COXIV, GAPDH.


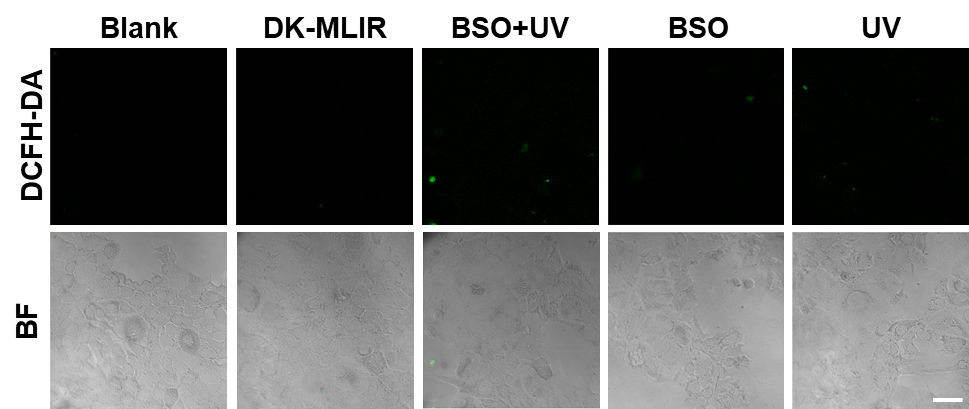


**Supplementary Figure 19. Intracellular ROS measurement.** Confocal images of AML-12 cells transfected without (Blank) and with DK-MLIR (180 nM) in absence (OK-MLIR), and presence of 10-min UV irradiation (UV), BSO inhibitor (100 µM BSO), as well as UV irradiation and BSO inhibitor (BSO+UV) after incubation with 10 μM DCFH-DA for 30 min. Scale bar: 60 µm.


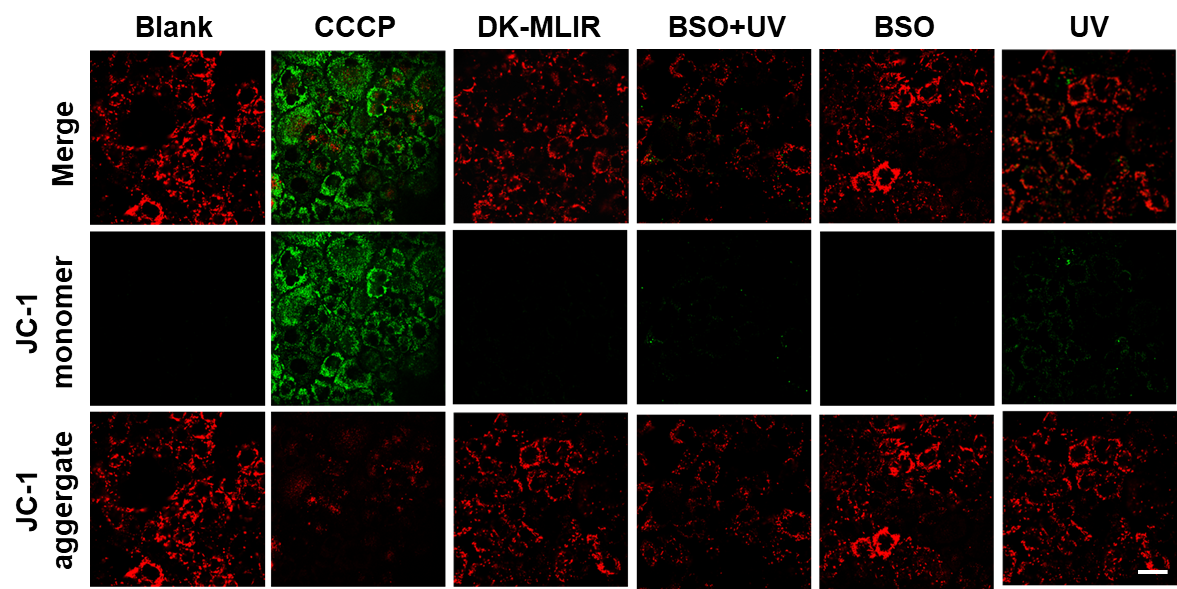


**Supplementary Figure 20. Mitochondrial membrane potential measurement.** Confocal images of AML-12 cells transfected without (Blank) and with DK-MLIR (180 nM) in absence (OK-MLIR), and presence of 10-min UV irradiation (UV), BSO inhibitor (100 µM BSO), as well as UV irradiation and BSO inhibitor (BSO+UV) after incubation with 1 mg/L JC-1 dye for 20 min. CCCP (10 μM) was the positive control group. Scale bar: 50µm.


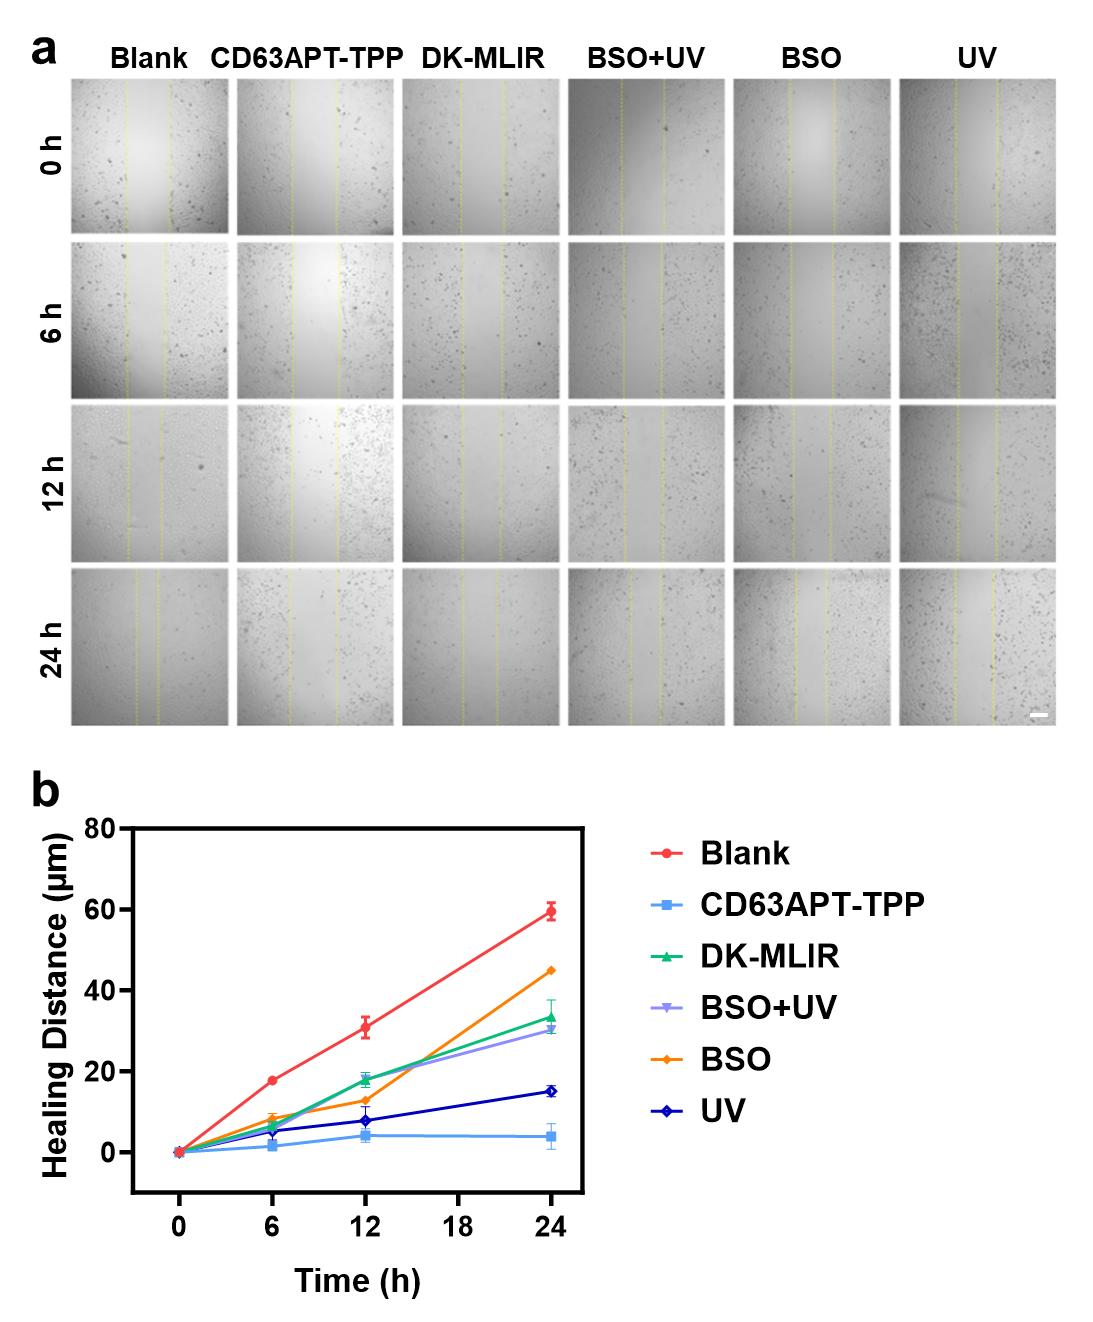


**Supplementary Figure 21. Wound healing assays. a.** Confocal images of HeLa cells transfected without (Blank) and with DK-MLIR (180 nM) in absence (OK-MLIR), and presence of 10-min UV irradiation (UV), BSO inhibitor (100 µM BSO), as well as UV irradiation and BSO inhibitor (BSO+UV) at different time points. The HeLa cells treated with CD63APT-TPP were used as positive control. The yellow lines indicate the wound edges. Scale bar: 200 µm. **b.** The distance of the wound was measured by ImageJ software in Supplementary Figure 21a. Shown are mean ± SEM from three individual experiments.


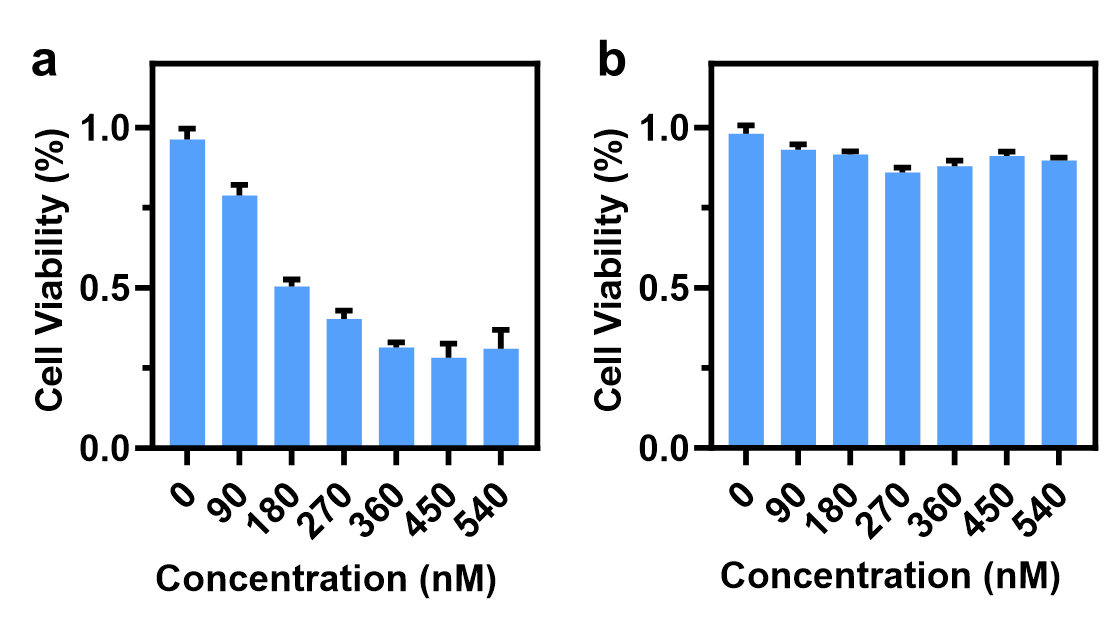


**Supplementary Figure 22. Cell viability assays. a.** Cytotoxicity of HeLa cells induced with different concentrations of the activated DK-MLIR. **b.** Cytotoxicity of Aml-12 cells induced with different concentrations of the activated DK-MLIR. Shown are mean ± SEM from three individual experiments.
